# Supplementary material for: Student Burnout in Higher Education: From Lockdowns to Classrooms
Source: MDPI journal article supplement (doi:10.3390/educsci12120842), 2022-11-22
Supplement: s1 [file s1]

## Supplementary Materials

### Supplementary Material 1 (SM1): Spring 2021 Beginning of the Semester (BOS) and End of the Semester (EOS) Surveys

*Link to survey in Surveyplanet*

Q1: "What is your name?"

Q2: "What is your age?"

Q3: "What is your home city and country?"

Q4: "What is your home university?"

Q5: "Which of the following best describes the focus of your academic studies?"

- Finance and Accounting
- Communications
- Business and Management
- Engineering
- Computer Science
- Other

Q6: "How do you feel about remote learning?"

- Very Unhappy
- Unhappy
- Somewhat Happy
- Somewhat Happy
- Happy
- Very Happy

Q7: "What are the top three things you like about online learning?" (Free Answer)

Q8: "What are the biggest challenges of online learning?" (Free Answer)

Q9: "After spending a lot of time learning online, please answer how strongly you agree or disagree with the following."

- "I like working at my own pace."
- "I am getting more sleep."
- "I miss my friends."
- "I am more easily distracted at home than in the classroom."
- "I like setting my own daily schedule for schoolwork"
- "I miss my teachers."
- "I have difficulty staying motivated to complete my assignments."
- "I am less stressed about my schoolwork."
- "I miss participating in sports."
- "I feel I am learning more than I do in school."
- "It is easier to focus without the distractions of school."
- "It's hard to keep school and home separate - I can't escape!"
- "I sometimes have difficulty understanding online assignments."
- "It's nice to have a break from the stress of the school environment."
- "I miss participating in extracurricular activities."
- "I feel that I'm not learning as much as I would in the classroom."
- "I struggle to keep up with a daily routine."

- “Teachers are assigning too much homework now.”

Q10: “Do you have a reliable internet connection at home to take part in remote learning and complete your assignments without interference or delay?” (Y/N)

Q11: “Do you have access to a computer that is adequate for your needs, allowing you to take part in remote learning and complete your school assignments?” (Y/N)

Q12: “In your home university, which of the following learning attributes apply to your previous online experience?”

- Live online lectures
- Pre-recorded online lectures
- Online group activities and presentations
- Interactive online learning games
- Personalized and individual feedback with professors
- Online multiple-choice testing
- Individual essay testing
- Other

Q13: “Which learning method is the one you have experienced the most during your university experience thus far?”

- Traditional online learning—Classroom centric
- Only online learning
- Hybrid learning: a combination of traditional and online
- Other

Q14: “Which learning method do you feel is the most effective for your education?”

- Traditional online learning—Classroom centric
- Only online learning
- Hybrid learning: a combination of traditional and online
- Other

Q15: “Please tell us how you would improve the university education experience in the future.” (Free Answer)

## **Supplementary Material 2 (SM2): Fall 2021 Beginning of the Semester (BOS) and End of the Semester (EOS) Surveys**

*Link to survey in Surveyplanet*

Q1: Please select the relevant course(s) and professor for the fall 2021 semester.

- Corvinus Consumer Behaviour, Professor Kevin Jackson
- Corvinus Services Marketing ISP, Professor Kevin Jackson
- Corvinus Services Marketing Master's, Professor Kevin Jackson
- Corvinus Entrepreneurs, Intrapreneurs, and Innovation, Professor Kevin Jackson
- ESSCA Digital Management, Professor Kevin Jackson

Q2: “What is your name?”

Q3: “What is your age?”

Q4: “What is your gender?”

Q5: “What is your home city and country?”

Q6: “What is your home university?”

Q7: Please check all of the relevant boxes regarding your education:

- Spring 2020 Semester: I was in high school
- Spring 2020 Semester: Enrolled in BA /BSC (undergraduate)
- Spring 2020 Semester: Enrolled in MA/MS (master's)
- Spring 2020 Semester: Passive or not a student at this time
- Fall 2020 Semester: I was in high school
- Fall 2020 Semester: enrolled in BA /BSC (undergraduate)
- Fall 2020 Semester: Enrolled in MA/MS (master's)
- Fall 2020 Semester: Passive or not a student at this time
- Spring 2021 Semester: I was in high school
- Spring 2021 Semester: Enrolled in BA /BSC (undergraduate)
- Spring 2021 Semester: Enrolled in MA/MS (master's)
- Spring 2021 Semester: Passive or not a student at this time

Q8: Which of the following best describes your education in the spring 2021 semester?

- Entirely online
- Hybrid learning (partly in the classroom, partly online)
- Entirely in the classroom
- Other

Q9: Which of the following best describes the focus of your academic studies\*

- Finance and Accounting
- Marketing Communications
- Business and Management
- Engineering
- Computer Science
- Political Science
- Other

Q10: How do you feel about remote learning using a scale of 1–5, where 1 = strongly dislike and 5 = strongly support?

Q11: BUR/EMO: Based on your spring 2021 educational experience, please rate the following items using a scale of 1–5, where 1 = not at all and 5 = absolutely.

- I felt emotionally drained/exhausted from my studies
- I felt I was working too hard on my studies
- Interacting with people all day now is really a strain for me
- Interacting with people all day now puts too much stress on me
- I felt I was able to help my student colleagues
- It was really hard to create a relaxed environment
- I feel as though I haven't accomplished worthwhile things

Q12: RES: Based on your spring 2021 educational experience, please rate the following items from a scale of 1–5, where 1 = not at all and 5 = absolutely.

1. I have the ability to change
2. I can handle whatever comes my way
3. I can see the humorous side of problems
4. I feel that coping with stress strengthens me
5. I can stay focused while under pressure

6. I can bounce back quickly after an illness or hardship
7. I can achieve my goals despite obstacles
8. I am not easily discouraged by failure
9. I view myself as a strong person
10. I can handle unpleasant feelings

Q13: GSE: Based on your spring 2021 educational experience, please rate the following items from a scale of 1–5, where 1 = not at all and 5 = absolutely.

- I can always manage to solve difficult problems if I try hard enough
- If someone opposes me, I can find the means and ways to get what I want
- It is easy for me to stick to my aims and accomplish my goals
- I am confident that I can deal efficiently with unexpected events
- Thanks to my resourcefulness, I know how to handle unforeseen situations
- I can solve most problems if I invest the necessary effort
- I can remain calm when facing difficulties due to my coping abilities
- When I am confronted with a problem, I can usually find several solutions
- If I am in trouble, I can usually think of a solution
- I can usually handle whatever comes my way

Q14: OED: Based on your spring 2021 remote learning experience, please rate the following items from a scale of 1–5, where 1 = not at all and 5 = absolutely.

- I had a reliable internet connection at home for remote learning.
- I have an adequate computer for remote learning.
- I received the necessary technical support from my school for remote learning
- I felt comfortable using my digital devices at home.
- I took to the transition to a digital work schedule with ease.
- Camera views from students make online classes more interactive
- The digital agenda has caused me many technical difficulties.
- I am enthusiastic about remote learning because it prepares me for the future.

Q15: COV: Based on your spring 2021 educational experience, please rate the following items from a scale of 1–5, where 1 = not at all and 5 = absolutely.

- Have you been satisfied with your school's response to the coronavirus crisis?
- Are you concerned about contracting COVID-19 by attending class?
- Are you concerned about exposing an elderly or immunocompromised family member to the virus by bringing it home from class?
- I received timely updates and information regarding COVID 19.
- How well did your school prepare for COVID 19?

Q16: HME: Based on your spring 2021 remote learning experience, please rate the following items from a scale of 1–5, where 1 = not at all and 5 = absolutely

- I like working at my own pace
- I get more sleep when learning remotely
- I missed my friends
- I am more easily distracted at home than in the classroom
- I like setting my own daily schedule for schoolwork
- I missed my teachers

- I have difficulty staying motivated when learning remotely
- I am less stressed about my schoolwork when learning remotely
- I missed participating in sports
- It's hard to keep school and home separate - I can't escape!
- It's nice to have a break from the stress of the school environment
- I missed participating in extracurricular activities
- I struggled to keep up with a daily routine
- I missed the social environment at school

Q17: HYB: Based on your spring 2021 educational experience using a scale from 1–5, please rate the following where 1 = strongly disagree and 5 = strongly agree.

- I support more technology use in my fully in-person courses
- The use of Kahoot games enhances my educational experience
- Pre-recorded lectures enhance my educational experience
- I will take some of my courses in a fully online format in the future
- Guest lecturers and judges enhanced my remote learning experience
- I will take some of my courses as a combination of in-person and online
- I really need face-to-face class discussion to learn
- An online environment makes it easier for me to communicate with my instructor and fellow students
- Face-to-face learning and online learning are complementary to each other.
- My preferred learning method is online learning
- My preferred learning method is traditional, face-to-face learning
- My preferred learning method is a combination of face-to-face and online learning

Q18: In your home university, which of the following learning attributes apply to your previous online experience? Multiple answers are possible.

- Live online lectures
- Pre-recorded online lectures
- Online group activities and presentations
- Interactive online learning games
- Personalized and individual feedback with professors
- Online multiple-choice testing
- Individual essay testing

Q19: Which learning method is the one you have experienced the most during your university experience thus far?

- Traditional online learning - Classroom centric
- Only online learning
- Hybrid learning: a combination of traditional and online

Q20: What are the top three things you like about online learning? Free answer.

Q21: What are the biggest challenges of online learning? Free answer.

Q22: I am grateful to receive your honest input. Please provide any additional suggestions regarding how university education should be improved

### Supplementary Material 3 (SM3): Abbreviations/Terminology

BOS: Beginning of the Semester

EOS: End of the Semester

BUR: Burnout

RES: Resiliency

GSE: General Self Efficacy

OED: Online Education Technical Support

COV: A University's Responses to COVID-19

HME: Home Environment Sentiment (referring to COVID-19 lockdown periods)

USM: University Self-Management

HYB: Hybrid Learning

Remote Learning Sentiment: The amount a student favors online learning.

Home Environment Sentiment: How a student sees their home environment related to their ability to learn.

General Self Efficacy: "General self-efficacy is the belief in one's competence to cope with a broad range of stressful or challenging demands, whereas specific self-efficacy is constrained to a particular task at hand" [30].

Resilience: "Resilience is the process and outcome of successfully adapting to difficult or challenging life experiences, especially through mental, emotional, and behavioral flexibility and adjustment to external and internal demands" (American Psychological Association).

University Self Management: The ability of a university to provide support to its students academically and administratively.

### Supplementary Material 4 (SM4): Items from the Maslach Burnout Inventory [2]

Selected statements are in bold letters.

#### *Emotional Exhaustion*

- **I feel emotionally drained from my work**
- I feel used up at the end of the workday
- I feel fatigued when I get up in the morning and have to face another day on the job
- **Working with people all day is really a strain for me**
- I feel burned out from my work
- I feel frustrated by my job
- **I feel I'm working too hard on my job**
- **Working with people directly puts too much stress on me**
- I feel like I'm at the end of my rope

#### *Personal Accomplishment*

- I can easily understand how my recipients feel about things
- I deal very effectively with problems of my recipients
- **I feel I'm positively influencing other people's lives through my work**
- I feel very energetic
- **I can easily create a relaxed atmosphere with my recipients**
- I feel exhilarated after working closely with my recipients
- **I have accomplished many worthwhile things in this job**

In my work, I deal with emotional problems very calmly

### Supplementary Material 5 (SM5): BOS and EOS Burnout Unidimensional Reliability (BUR)

#### BOS Burnout Unidimensional Reliability (BUR)

##### Frequentist Scale Reliability Statistics

| Estimate           | Cronbach's $\alpha$ |
|--------------------|---------------------|
| Point Estimate     | 0,667               |
| 95% CI lower bound | 0,549               |
| 95% CI upper bound | 0,758               |

Note: Of the observations, pairwise complete cases were used.

##### Frequentist Individual Item Reliability Statistics

| If Item Dropped |                     |                       |
|-----------------|---------------------|-----------------------|
| Item            | Cronbach's $\alpha$ | Item–rest correlation |
| BOS_BUR1        | 0,649               | 0,34                  |
| BOS_BUR3        | 0,583               | 0,497                 |
| BOS_BUR4        | 0,618               | 0,416                 |
| BOS_BUR6        | 0,633               | 0,388                 |
| BOS_BUR7        | 0,591               | 0,47                  |

Note: Questions 2 and 5 removed due to a lack of significance.

#### EOS Burnout Unidimensional Reliability (BUR)

##### Frequentist Scale Reliability Statistics

| Estimate           | Cronbach's $\alpha$ |
|--------------------|---------------------|
| Point Estimate     | 0,732               |
| 95% CI lower bound | 0,636               |
| 95% CI upper bound | 0,806               |

Note: Of the observations, pairwise complete cases were used.

##### Frequentist Individual Item Reliability Statistics

| If Item Dropped |                     |                       |
|-----------------|---------------------|-----------------------|
| Item            | Cronbach's $\alpha$ | Item–rest correlation |
| EOS_BUR1        | 0,762               | 0,297                 |
| EOS_BUR3        | 0,639               | 0,624                 |
| EOS_BUR4        | 0,647               | 0,594                 |
| EOS_BUR6        | 0,63                | 0,631                 |
| EOS_BUR7        | 0,733               | 0,374                 |

Note: Questions 2 and 5 removed due to a lack of significance.

### Supplementary Material 6 (SM6): Connor–Davidson [37] Resilience Scale

Selected statements are in bold letters.

| Item no. | Description                         |
|----------|-------------------------------------|
| 1        | <b>Able to adapt to change</b>      |
| 2        | Close and secure relationships      |
| 3        | Sometimes fate or God can help      |
| 4        | <b>Can deal with whatever comes</b> |

- 5 Past success gives confidence for new challenge
- 6 **See the humorous side of things**
- 7 **Coping with stress strengthens**
- 8 **Tend to bounce back after illness or hardship**
- 9 Things happen for a reason
- 10 Best effort no matter what
- 11 **You can achieve your goals**
- 12 When things look hopeless, I don't give up
- 13 Know where to turn for help
- 14 **Under pressure, focus and think clearly**
- 15 Prefer to take the lead in problem solving
- 16 **Not easily discouraged by failure**
- 17 **Think of self as strong person**
- 18 Make unpopular or difficult decisions
- 19 **Can handle unpleasant feelings**
- 20 Have to act on a hunch
- 21 Strong sense of purpose
- 22 In control of your life
- 23 I like challenges
- 24 You work to attain your goals
- 25 Pride in your achievements

#### Supplementary Material 7 (SM7): BOS and EOS Resiliency Unidimensional Reliability (RES)

##### BOS Resiliency Unidimensional Reliability (RES)

###### Frequentist Scale Reliability Statistics

| Estimate           | Cronbach's $\alpha$ |
|--------------------|---------------------|
| Point Estimate     | 0,784               |
| 95% CI lower bound | 0,713               |
| 95% CI upper bound | 0,84                |

Note: Of the observations, pairwise complete cases were used.

###### Frequentist Individual Item Reliability Statistics

| Item      | If Item Dropped     |                       |
|-----------|---------------------|-----------------------|
|           | Cronbach's $\alpha$ | Item-rest correlation |
| BOS_RES1  | 0,773               | 0,379                 |
| BOS_RES2  | 0,759               | 0,506                 |
| BOS_RES3  | 0,775               | 0,389                 |
| BOS_RES4  | 0,778               | 0,353                 |
| BOS_RES5  | 0,762               | 0,479                 |
| BOS_RES6  | 0,767               | 0,44                  |
| BOS_RES7  | 0,762               | 0,49                  |
| BOS_RES8  | 0,77                | 0,416                 |
| BOS_RES9  | 0,758               | 0,615                 |
| BOS_RES10 | 0,758               | 0,506                 |



#### EOS Resiliency Unidimensional Reliability (RES)

##### Frequentist Scale Reliability Statistics

| Estimate           | Cronbach's $\alpha$ |
|--------------------|---------------------|
| Point Estimate     | 0,81                |
| 95% CI lower bound | 0,75                |
| 95% CI upper bound | 0,859               |

Note: Of the observations, pairwise complete cases were used.

##### Frequentist Individual Item Reliability Statistics

| Item      | If Item Dropped     |                       |
|-----------|---------------------|-----------------------|
|           | Cronbach's $\alpha$ | Item–rest correlation |
| EOS_RES1  | 0,812               | 0,28                  |
| EOS_RES2  | 0,775               | 0,682                 |
| EOS_RES3  | 0,803               | 0,413                 |
| EOS_RES4  | 0,805               | 0,396                 |
| EOS_RES5  | 0,789               | 0,531                 |
| EOS_RES6  | 0,806               | 0,396                 |
| EOS_RES7  | 0,786               | 0,585                 |
| EOS_RES8  | 0,779               | 0,605                 |
| EOS_RES9  | 0,78                | 0,617                 |
| EOS_RES10 | 0,796               | 0,463                 |

#### Supplementary Material 8 (SM8): Generalized Self-Efficacy Scale (GSE) [28]

1. I can always manage to solve difficult problems if I try hard enough.
2. If someone opposes me, I can find the means and ways to get what I want.
3. It is easy for me to stick to my aims and accomplish my goals.
4. I am confident that I could deal efficiently with unexpected events.
5. Thanks to my resourcefulness, I know how to handle unforeseen situations.
6. I can solve most problems if I invest the necessary effort.
7. I can remain calm when facing difficulties because I can rely on my coping abilities.
8. When I am confronted with a problem, I can usually find several solutions.
9. If I am in trouble, I can usually think of a solution.
10. I can usually handle whatever comes my way.

#### Supplementary Material 9 (SM9): BOS and EOS General Self Efficacy Unidimensional Reliability (GSE)

##### BOS General Self Efficacy Unidimensional Reliability (GSE)

##### Frequentist Scale Reliability Statistics

| Estimate           | Cronbach's $\alpha$ |
|--------------------|---------------------|
| Point Estimate     | 0,823               |
| 95% CI lower bound | 0,766               |
| 95% CI upper bound | 0,869               |

Note: Of the observations, pairwise complete cases were used.

##### Frequentist Individual Item Reliability Statistics

| If Item Dropped |                     |                       |
|-----------------|---------------------|-----------------------|
| Item            | Cronbach's $\alpha$ | Item–rest correlation |
| BOS_GSE1        | 0,813               | 0,46                  |
| BOS_GSE2        | 0,809               | 0,496                 |
| BOS_GSE3        | 0,811               | 0,476                 |
| BOS_GSE4        | 0,799               | 0,583                 |
| BOS_GSE5        | 0,801               | 0,565                 |
| BOS_GSE6        | 0,809               | 0,499                 |
| BOS_GSE7        | 0,828               | 0,381                 |
| BOS_GSE8        | 0,81                | 0,485                 |
| BOS_GSE9        | 0,808               | 0,502                 |
| BOS_GSE10       | 0,776               | 0,716                 |

#### EOS General Self Efficacy Unidimensional Reliability (GSE)

##### Frequentist Scale Reliability Statistics

| Estimate           | Cronbach's $\alpha$ |
|--------------------|---------------------|
| Point Estimate     | 0,799               |
| 95% CI lower bound | 0,735               |
| 95% CI upper bound | 0,851               |

Note: Of the observations, pairwise complete cases were used.

##### Frequentist Individual Item Reliability Statistics

| If Item Dropped |                     |                       |
|-----------------|---------------------|-----------------------|
| Item            | Cronbach's $\alpha$ | Item–rest correlation |
| EOS_GSE1        | 0,785               | 0,447                 |
| EOS_GSE2        | 0,8                 | 0,329                 |
| EOS_GSE3        | 0,798               | 0,323                 |
| EOS_GSE4        | 0,771               | 0,556                 |
| EOS_GSE5        | 0,775               | 0,529                 |
| EOS_GSE6        | 0,78                | 0,502                 |
| EOS_GSE7        | 0,8                 | 0,333                 |
| EOS_GSE8        | 0,766               | 0,599                 |
| EOS_GSE9        | 0,766               | 0,63                  |
| EOS_GSE10       | 0,774               | 0,539                 |

#### Supplementary Material 10 (SM10): BOS and EOS Online Education Unidimensional Reliability (OED)

##### BOS Online Education Unidimensional Reliability (OED)

##### Frequentist Scale Reliability Statistics

| Estimate           | Cronbach's $\alpha$ |
|--------------------|---------------------|
| Point Estimate     | 0,676               |
| 95% CI lower bound | 0,568               |
| 95% CI upper bound | 0,762               |

Note: Of the observations, pairwise complete cases were used.

#### Frequentist Individual Item Reliability Statistics

| Item     | If Item Dropped     |                       |
|----------|---------------------|-----------------------|
|          | Cronbach's $\alpha$ | Item-rest correlation |
| BOS_OED1 | 0,636               | 0,406                 |
| BOS_OED2 | 0,624               | 0,503                 |
| BOS_OED3 | 0,661               | 0,332                 |
| BOS_OED4 | 0,607               | 0,532                 |
| BOS_OED5 | 0,614               | 0,48                  |
| BOS_OED6 | 0,676               | 0,283                 |
| BOS_OED8 | 0,672               | 0,278                 |

Note: Question 7 was removed due to a lack of significance.

#### EOS Online Education Unidimensional Reliability (OED)

##### Frequentist Scale Reliability Statistics

| Estimate           | Cronbach's $\alpha$ |
|--------------------|---------------------|
| Point Estimate     | 0,659               |
| 95% CI lower bound | 0,545               |
| 95% CI upper bound | 0,749               |

Note: Of the observations, pairwise complete cases were used.

#### Frequentist Individual Item Reliability Statistics

| Item     | If Item Dropped     |                       |
|----------|---------------------|-----------------------|
|          | Cronbach's $\alpha$ | Item-rest correlation |
| EOS_OED1 | 0,611               | 0,408                 |
| EOS_OED2 | 0,639               | 0,322                 |
| EOS_OED3 | 0,63                | 0,354                 |
| EOS_OED4 | 0,63                | 0,346                 |
| EOS_OED5 | 0,575               | 0,529                 |
| EOS_OED6 | 0,6                 | 0,468                 |
| EOS_OED8 | 0,671               | 0,23                  |

Note: Question 7 was removed due to a lack of significance.

### **Supplementary Material 11 (SM11): BOS and EOS COVID-19 University Response Unidimensional Reliability (COV)**

#### BOS COVID-19 University Response Unidimensional Reliability (COV)

##### Frequentist Scale Reliability Statistics

| Estimate           | Cronbach's $\alpha$ |
|--------------------|---------------------|
| Point Estimate     | 0,698               |
| 95% CI lower bound | 0,575               |
| 95% CI upper bound | 0,789               |

Note: Of the observations, pairwise complete cases were used.

#### Frequentist Individual Item Reliability Statistics

| Item | If Item Dropped     |                       |
|------|---------------------|-----------------------|
|      | Cronbach's $\alpha$ | Item-rest correlation |

|          |       |       |
|----------|-------|-------|
| BOS_COV1 | 0,55  | 0,558 |
| BOS_COV4 | 0,81  | 0,356 |
| BOS_COV5 | 0,429 | 0,658 |

Note: Questions 2 and 3 were removed due to a lack of significance.

EOS COVID-19 University Response Unidimensional Reliability (COV)

Frequentist Scale Reliability Statistics

| Estimate           | Cronbach's $\alpha$ |
|--------------------|---------------------|
| Point Estimate     | 0,69                |
| 95% CI lower bound | 0,567               |
| 95% CI upper bound | 0,783               |

Note: Of the observations, pairwise complete cases were used.

Frequentist Individual Item Reliability Statistics

| If Item Dropped |                     |                       |
|-----------------|---------------------|-----------------------|
| Item            | Cronbach's $\alpha$ | Item–rest correlation |
| EOS_COV1        | 0,604               | 0,5                   |
| EOS_COV4        | 0,748               | 0,399                 |
| EOS_COV5        | 0,44                | 0,647                 |

Note: Questions 2 and 3 were removed due to a lack of significance.

### **Supplementary Material 12 (SM12): BOS Home Environment and EOS University Self-Management Unidimensional Reliability (HME) (USM)**

BOS Home Environment Unidimensional Reliability (HME)

Frequentist Scale Reliability Statistics

| Estimate           | Cronbach's $\alpha$ |
|--------------------|---------------------|
| Point Estimate     | 0,667               |
| 95% CI lower bound | 0,549               |
| 95% CI upper bound | 0,758               |

Note: Of the observations, pairwise complete cases were used.

Frequentist Individual Item Reliability Statistics

| If Item Dropped |                     |                       |
|-----------------|---------------------|-----------------------|
| Item            | Cronbach's $\alpha$ | Item–rest correlation |
| BOS_HME1        | 0,648               | 0,44                  |
| BOS_HME2        | 0,595               | 0,322                 |
| BOS_HME3        | 0,647               | 0,429                 |
| BOS_HME4        | 0,53                | 0,659                 |
| BOS_HME5        | 0,655               | 0,415                 |

Note: Questions 2, 3, 6, 8, 9, 10, 11 and 12 were removed due to a lack of significance

The following items were reverse scaled: BOS\_HME4, BOS\_HME7 and BOS\_HME13.

EOS University Self-Management Unidimensional Reliability (USM)

Kaiser–Meyer–Olkin test

| MSA         |       |
|-------------|-------|
| Overall MSA | 0,846 |

|           |       |
|-----------|-------|
| EOS_HME1  | 0,894 |
| EOS_HME2  | 0,552 |
| EOS_HME3  | 0,81  |
| EOS_HME4  | 0,912 |
| EOS_HME5  | 0,894 |
| EOS_HME6  | 0,902 |
| EOS_HME7  | 0,883 |
| EOS_HME8  | 0,527 |
| EOS_HME9  | 0,684 |
| EOS_HME10 | 0,924 |
| EOS_HME11 | 0,742 |
| EOS_HME12 | 0,669 |
| EOS_HME13 | 0,881 |
| EOS_HME14 | 0,848 |

Note: Questions 2, 8, 9 and 11 were removed due to lack of significance.

#### Chi-squared Test

|       | Value   | df | p      |
|-------|---------|----|--------|
| Model | 199,454 | 64 | < .001 |

#### Component Loadings

|           | RC1   | RC2   | Uniqueness |
|-----------|-------|-------|------------|
| EOS_HME1  | 0,777 |       | 0,377      |
| EOS_HME2  |       | 0,559 | 0,685      |
| EOS_HME3  | 0,713 |       | 0,458      |
| EOS_HME4  | 0,789 |       | 0,377      |
| EOS_HME5  | 0,709 |       | 0,475      |
| EOS_HME6  | 0,824 |       | 0,324      |
| EOS_HME7  | 0,855 |       | 0,262      |
| EOS_HME8  |       | 0,641 | 0,587      |
| EOS_HME9  | 0,424 | 0,41  | 0,674      |
| EOS_HME10 | 0,724 |       | 0,478      |
| EOS_HME11 |       | 0,709 | 0,317      |
| EOS_HME12 | 0,454 | 0,612 | 0,453      |
| EOS_HME13 | 0,771 |       | 0,408      |
| EOS_HME14 | 0,751 |       | 0,423      |

Note: Applied rotation method is oblimin.

#### Frequentist Scale Reliability Statistics

| Estimate           | Cronbach's $\alpha$ |
|--------------------|---------------------|
| Point Estimate     | 0,903               |
| 95% CI lower bound | 0,872               |
| 95% CI upper bound | 0,928               |

Note: Of the observations, pairwise complete cases were used.

#### Frequentist Individual Item Reliability Statistics

| Item      | If Item Dropped     |                       |
|-----------|---------------------|-----------------------|
|           | Cronbach's $\alpha$ | Item–rest correlation |
| EOS_HME1  | 0,892               | 0,707                 |
| EOS_HME2  | 0,895               | 0,626                 |
| EOS_HME3  | 0,888               | 0,731                 |
| EOS_HME4  | 0,894               | 0,644                 |
| EOS_HME5  | 0,887               | 0,762                 |
| EOS_HME6  | 0,884               | 0,798                 |
| EOS_HME7  | 0,894               | 0,655                 |
| EOS_HME8  | 0,913               | 0,345                 |
| EOS_HME9  | 0,889               | 0,714                 |
| EOS_HME10 | 0,892               | 0,673                 |

Note: Questions 2, 8, 9 and 11 were removed due to lack of significance.

#### Supplementary Material 13 (SM13): BOS Hybrid Learning Unidimensional Reliability (HYB)

##### Principal Component Analysis

##### Chi-squared Test

|       | Value   | df | p      |
|-------|---------|----|--------|
| Model | 114,569 | 43 | < .001 |

##### Component Loadings

|           | Prefer online | Prefer hybrid | Uniqueness |
|-----------|---------------|---------------|------------|
| BOS_HYB1  |               | 0,447         | 0,819      |
| BOS_HYB2  |               | 0,534         | 0,732      |
| BOS_HYB3  |               | 0,441         | 0,817      |
| BOS_HYB4  | 0,727         |               | 0,266      |
| BOS_HYB5  |               | 0,655         | 0,62       |
| BOS_HYB6  | 0,415         | 0,516         | 0,415      |
| BOS_HYB7  | -0,889        |               | 0,277      |
| BOS_HYB8  |               |               | 0,684      |
| BOS_HYB9  |               | 0,615         | 0,533      |
| BOS_HYB10 | 0,889         |               | 0,239      |
| BOS_HYB11 | -0,861        |               | 0,196      |
| BOS_HYB12 |               | 0,591         | 0,426      |

Note: Applied rotation method is oblimin.

#### Frequentist Scale Reliability Statistics

| Estimate | Cronbach's $\alpha$ |
|----------|---------------------|
|----------|---------------------|

|                    |       |
|--------------------|-------|
| Point Estimate     | 0,892 |
| 95% CI lower bound | 0,852 |
| 95% CI upper bound | 0,922 |

Note: Of the observations, pairwise complete cases were used.

#### Frequentist Individual Item Reliability Statistics

| If Item Dropped |                     |                       |
|-----------------|---------------------|-----------------------|
| Item            | Cronbach's $\alpha$ | Item-rest correlation |
| BOS_HYB4        | 0,883               | 0,71                  |
| BOS_HYB7        | 0,872               | 0,729                 |
| BOS_HYB10       | 0,848               | 0,793                 |
| BOS_HYB11       | 0,839               | 0,83                  |

Note: Questions 1, 2, 3, 5, 6, 8, 9 and 12 were removed due to lack of significance.

The following items were reverse scaled: BOS\_HYB7 and BOS\_HYB11.

#### Frequentist Scale Reliability Statistics

| Estimate           | Cronbach's $\alpha$ |
|--------------------|---------------------|
| Point Estimate     | 0,753               |
| 95% CI lower bound | 0,668               |
| 95% CI upper bound | 0,82                |

Note: Of the observations, pairwise complete cases were used.

#### Frequentist Individual Item Reliability Statistics

| If Item Dropped |                     |                       |
|-----------------|---------------------|-----------------------|
| Item            | Cronbach's $\alpha$ | Item-rest correlation |
| BOS_HYB5        | 0,807               | 0,307                 |
| BOS_HYB6        | 0,658               | 0,614                 |
| BOS_HYB9        | 0,687               | 0,566                 |
| BOS_HYB12       | 0,584               | 0,733                 |

### Supplementary Material 14 (SM14): Fall 2021 BOS and EOS Burnout Regression Analysis

#### Fall 2021 BOS Burnout Regression Analysis

| Model | R     | R <sup>2</sup> | Adjusted R <sup>2</sup> | RMSE  | R <sup>2</sup> Change | F Change | df1 | df2 | p     |
|-------|-------|----------------|-------------------------|-------|-----------------------|----------|-----|-----|-------|
| H1    | 0,15  | 0,023          | 0,003                   | 0,764 | 0,023                 | 1,14     | 2   | 99  | 0,324 |
| H2    | 0,327 | 0,107          | 0,08                    | 0,734 | 0,085                 | 9,277    | 1   | 98  | 0,003 |
| H3    | 0,386 | 0,149          | 0,114                   | 0,72  | 0,042                 | 4,81     | 1   | 97  | 0,031 |
| H4    | 0,423 | 0,179          | 0,136                   | 0,711 | 0,03                  | 3,487    | 1   | 96  | 0,065 |

H1—age and gender; H2—age, gender + self-eff; H3—age, gender, self-eff + sentiment; H4—age, gender, self-eff, sentiment + HO+.

| ANOVA |            |                |     |             |       |       |
|-------|------------|----------------|-----|-------------|-------|-------|
| Model |            | Sum of Squares | df  | Mean Square | F     | p     |
| H1    | Regression | 1,332          | 2   | 0,666       | 1,14  | 0,324 |
|       | Residual   | 57,809         | 99  | 0,584       |       |       |
|       | Total      | 59,141         | 101 |             |       |       |
| H2    | Regression | 6,331          | 3   | 2,11        | 3,916 | 0,011 |
|       | Residual   | 52,81          | 98  | 0,539       |       |       |
|       | Total      | 59,141         | 101 |             |       |       |
| H3    | Regression | 8,826          | 4   | 2,206       | 4,254 | 0,003 |
|       | Residual   | 50,315         | 97  | 0,519       |       |       |
|       | Total      | 59,141         | 101 |             |       |       |
| H4    | Regression | 10,59          | 5   | 2,118       | 4,188 | 0,002 |
|       | Residual   | 48,551         | 96  | 0,506       |       |       |
|       | Total      | 59,141         | 101 |             |       |       |

Note: Null model includes age and gender.

| Coefficients |                      |                |                |              |        |        |                         |      |
|--------------|----------------------|----------------|----------------|--------------|--------|--------|-------------------------|------|
| Model        |                      | Unstandardized | Standard Error | Standardized | T      | p      | Collinearity Statistics |      |
|              |                      |                |                |              |        |        | Tolerance               | VIF  |
| H1           | (Intercept)          | 2,883          | 0,755          |              | 3,817  | < .001 |                         |      |
|              | age                  | -0,016         | 0,034          | -0,047       | -0,469 | 0,64   | 1                       | 1    |
|              | gender (female)      | 0,234          | 0,159          |              | 1,473  | 0,144  |                         |      |
| H2           | (Intercept)          | 3,984          | 0,811          |              | 4,915  | < .001 |                         |      |
|              | age                  | 0,011          | 0,034          | 0,034        | 0,34   | 0,735  | 0,94                    | 1,07 |
|              | gender (female)      | 0,177          | 0,154          |              | 1,153  | 0,252  |                         |      |
|              | BOS_Self-eff         | -0,444         | 0,146          | -0,303       | -3,046 | 0,003  | 0,94                    | 1,07 |
| H3           | (Intercept)          | 4,377          | 0,815          |              | 5,369  | < .001 |                         |      |
|              | age                  | 0,014          | 0,033          | 0,043        | 0,436  | 0,664  | 0,93                    | 1,07 |
|              | gender (female)      | 0,149          | 0,152          |              | 0,981  | 0,329  |                         |      |
|              | BOS_Self-eff         | -0,444         | 0,143          | -0,303       | -3,108 | 0,002  | 0,94                    | 1,07 |
|              | BOS_Sentiment_report | -0,147         | 0,067          | -0,206       | -2,193 | 0,031  | 1                       | 1,00 |
|              | mote                 |                |                |              |        |        |                         | 1    |
| H4           | (Intercept)          | 4,255          | 0,808          |              | 5,269  | < .001 |                         |      |



|                          |        |       |        |        |       |      |       |
|--------------------------|--------|-------|--------|--------|-------|------|-------|
| age                      | 0,037  | 0,035 | 0,109  | 1,06   | 0,292 | 0,82 | 1,218 |
| gender (female)          | 0,146  | 0,15  |        | 0,975  | 0,332 |      |       |
| BOS_Self-eff             | -0,43  | 0,141 | -0,293 | -3,04  | 0,003 | 0,93 | 1,073 |
| BOS_Sentiment_re<br>mote | -0,061 | 0,081 | -0,085 | -0,751 | 0,454 | 0,67 | 1,495 |
| BOS_Hopositive           | -0,215 | 0,115 | -0,224 | -1,867 | 0,065 | 0,6  | 1,675 |

**Model Summary - BOS\_Burnout**

| Model          | R     | R <sup>2</sup> | Adjusted R <sup>2</sup> | RMSE | R <sup>2</sup><br>Change | F<br>Change | df1 | df2 | p     |
|----------------|-------|----------------|-------------------------|------|--------------------------|-------------|-----|-----|-------|
| H <sub>1</sub> | 0,417 | 0,174          | 0,14                    | 0,71 | 0,067                    | 7,892       | 1   | 97  | 0,006 |

Note: age, gender, BOS\_Self-eff and HO+ are included

**ANOVA**

| Model          |            | Sum of Squares | df  | Mean Square | F     | p      |
|----------------|------------|----------------|-----|-------------|-------|--------|
| H <sub>1</sub> | Regression | 10,304         | 4   | 2,576       | 5,117 | < .001 |
|                | Residual   | 48,837         | 97  | 0,503       |       |        |
|                | Total      | 59,141         | 101 |             |       |        |

Note: the null model includes age, gender, and BOS\_Self-eff

**Coefficients**

| Model          |                 | Unstandardized | Standard Error | Standardized <sup>a</sup> | T      | p      | Collinearity Statistics |                  |
|----------------|-----------------|----------------|----------------|---------------------------|--------|--------|-------------------------|------------------|
|                |                 |                |                |                           |        |        | Tolerance <sup>a</sup>  | VIF <sup>a</sup> |
| H <sub>1</sub> | (Intercept)     | 4,118          | 0,785          |                           | 5,247  | < .001 |                         |                  |
|                | age             | 0,041          | 0,034          | 0,122                     | 1,205  | 0,231  | 0,85                    | 1,18             |
|                | gender (female) | 0,153          | 0,149          |                           | 1,029  | 0,306  |                         |                  |
|                | BOS_Self-eff    | -0,426         | 0,141          | -0,291                    | -3,024 | 0,003  | 0,93                    | 1,073            |
|                | BOS_Hopositive  | -0,265         | 0,094          | -0,275                    | -2,809 | 0,006  | 0,89                    | 1,122            |

# Fall 2021 EOS Burnout Regression Analysis

Model Summary - EOS\_Burnout

| Model | R     | R <sup>2</sup> | Adjusted R <sup>2</sup> | RMSE  | R <sup>2</sup> Change | F Change | df1 | df2 | p      |
|-------|-------|----------------|-------------------------|-------|-----------------------|----------|-----|-----|--------|
| 1     |       |                |                         |       |                       |          |     |     |        |
| H1    | 0,162 | 0,026          | 0,005                   | 0,745 | 0,026                 | 1,234    | 2   | 92  | 0,296  |
| H2    | 0,193 | 0,037          | 0,006                   | 0,745 | 0,011                 | 1,05     | 1   | 91  | 0,308  |
| H3    | 0,402 | 0,162          | 0,125                   | 0,699 | 0,125                 | 13,394   | 1   | 90  | < .001 |
| H4    | 0,469 | 0,22           | 0,176                   | 0,678 | 0,058                 | 6,587    | 1   | 89  | 0,012  |
| H5    | 0,541 | 0,293          | 0,244                   | 0,649 | 0,073                 | 9,054    | 1   | 88  | 0,003  |

ANOVA

| Model |            | Sum of Squares | df | Mean Square | F     | p      |
|-------|------------|----------------|----|-------------|-------|--------|
| 1     |            |                |    |             |       |        |
| H1    | Regression | 1,371          | 2  | 0,685       | 1,234 | 0,296  |
|       | Residual   | 51,077         | 92 | 0,555       |       |        |
|       | Total      | 52,448         | 94 |             |       |        |
| H2    | Regression | 1,953          | 3  | 0,651       | 1,173 | 0,324  |
|       | Residual   | 50,495         | 91 | 0,555       |       |        |
|       | Total      | 52,448         | 94 |             |       |        |
| H3    | Regression | 8,494          | 4  | 2,124       | 4,348 | 0,003  |
|       | Residual   | 43,954         | 90 | 0,488       |       |        |
|       | Total      | 52,448         | 94 |             |       |        |
| H4    | Regression | 11,523         | 5  | 2,305       | 5,012 | < .001 |
|       | Residual   | 40,925         | 89 | 0,46        |       |        |
|       | Total      | 52,448         | 94 |             |       |        |
| H5    | Regression | 15,341         | 6  | 2,557       | 6,064 | < .001 |
|       | Residual   | 37,107         | 88 | 0,422       |       |        |
|       | Total      | 52,448         | 94 |             |       |        |

Note: Null model includes age and gender

| Coefficients |                       |                |                |                           |        |        |                         |                  |
|--------------|-----------------------|----------------|----------------|---------------------------|--------|--------|-------------------------|------------------|
| Model        |                       | Unstandardized | Standard Error | Standardized <sup>a</sup> | T      | p      | Collinearity Statistics |                  |
|              |                       |                |                |                           |        |        | Tolerance <sup>a</sup>  | VIF <sup>a</sup> |
| H<br>1       | (Intercept)           | 3,316          | 0,755          |                           | 4,392  | < .001 |                         |                  |
|              | age                   | -0,051         | 0,034          | -0,156                    | -1,508 | 0,135  | 1                       | 1                |
|              | gender (female)       | 0,091          | 0,161          |                           | 0,567  | 0,572  |                         |                  |
| H<br>2       | (Intercept)           | 3,706          | 0,845          |                           | 4,384  | < .001 |                         |                  |
|              | age                   | -0,035         | 0,037          | -0,109                    | -0,965 | 0,337  | 0,852                   | 1,17             |
|              | gender (female)       | 0,056          | 0,165          |                           | 0,341  | 0,734  |                         |                  |
|              | EOS_Self-eff          | -0,185         | 0,181          | -0,117                    | -1,025 | 0,308  | 0,852                   | 1,17             |
| H<br>3       | (Intercept)           | 4,632          | 0,833          |                           | 5,564  | < .001 |                         |                  |
|              | age                   | -0,029         | 0,035          | -0,091                    | -0,854 | 0,396  | 0,85                    | 1,18             |
|              | gender (female)       | 0,056          | 0,155          |                           | 0,36   | 0,719  |                         |                  |
|              | EOS_Self-eff          | -0,135         | 0,17           | -0,085                    | -0,796 | 0,428  | 0,847                   | 1,18             |
|              | EOS_UniSelfManagement | -0,32          | 0,087          | -0,356                    | -3,66  | < .001 | 0,986                   | 1,01             |
| H<br>4       | (Intercept)           | 5,313          | 0,85           |                           | 6,249  | < .001 |                         |                  |
|              | age                   | -0,038         | 0,034          | -0,117                    | -1,128 | 0,262  | 0,841                   | 1,19             |
|              | gender (female)       | 0,046          | 0,15           |                           | 0,306  | 0,761  |                         |                  |
|              | EOS_Self-eff          | 0,018          | 0,175          | 0,011                     | 0,103  | 0,918  | 0,742                   | 1,35             |
|              | EOS_UniSelfManagement | -0,189         | 0,099          | -0,211                    | -1,916 | 0,059  | 0,726                   | 1,38             |
|              | EOS_Technical         | -0,38          | 0,148          | -0,299                    | -2,567 | 0,012  | 0,645                   | 1,55             |
| H<br>5       | (Intercept)           | 3,94           | 0,933          |                           | 4,221  | < .001 |                         |                  |
|              | age                   | -0,047         | 0,032          | -0,146                    | -1,465 | 0,147  | 0,833                   | 1,2              |
|              | gender (female)       | 0,044          | 0,144          |                           | 0,305  | 0,761  |                         |                  |
|              | EOS_Self-eff          | -0,021         | 0,168          | -0,013                    | -0,124 | 0,902  | 0,737                   | 1,36             |
|              | EOS_UniSelfManagement | -0,049         | 0,106          | -0,054                    | -0,463 | 0,645  | 0,584                   | 1,71             |
|              | EOS_Technical         | -0,289         | 0,145          | -0,228                    | -1,996 | 0,049  | 0,617                   | 1,62             |
|              | EOS_Sentiment_report  | 0,247          | 0,082          | 0,336                     | 3,009  | 0,003  | 0,646                   | 1,55             |

**Supplementary Material 15 (SM15): Fall 2021 BOS and EOS Burnout Mediation Analysis**

### Fall 2021 BOS Burnout Mediation Analysis

| Direct Effects                                                               |   |             |          |            |         |         |                         |        |
|------------------------------------------------------------------------------|---|-------------|----------|------------|---------|---------|-------------------------|--------|
|                                                                              |   |             | Estimate | Std. Error | z-value | p       | 95% Confidence Interval |        |
|                                                                              |   |             |          |            |         |         | Lower                   | Upper  |
| BOS Remote Sentiment                                                         | → | BOS Burnout | -0,076   | 0,076      | -1,003  | 0,316   | -0.225                  | 0,073  |
| BOS Self-eff                                                                 | → | BOS Burnout | -0,431   | 0,119      | -3,634  | < 0.001 | -0.664                  | -0.199 |
| Note: Robust standard errors, robust confidence intervals and DWLS estimator |   |             |          |            |         |         |                         |        |

| Indirect Effects                                                              |   |            |   |             |          |            |         |       |                         |        |
|-------------------------------------------------------------------------------|---|------------|---|-------------|----------|------------|---------|-------|-------------------------|--------|
|                                                                               |   |            |   |             | Estimate | Std. Error | z-value | p     | 95% Confidence Interval |        |
|                                                                               |   |            |   |             |          |            |         |       | Lower                   | Upper  |
| BOS Remote                                                                    | → | BOS Home + | → | BOS Burnout | -0.09    | 0,045      | -1,992  | 0,046 | -0,179                  | -0,001 |
| BOS Self-eff                                                                  | → | BOS Home + | → | BOS Burnout | -0.015   | 0,024      | -0,612  | 0,54  | -0,063                  | 0,033  |
| Note: Robust standard errors, robust confidence intervals, and DWLS estimator |   |            |   |             |          |            |         |       |                         |        |

| Total Effects                                                                 |   |             |          |            |         |        |                         |        |
|-------------------------------------------------------------------------------|---|-------------|----------|------------|---------|--------|-------------------------|--------|
|                                                                               |   |             | Estimate | Std. Error | z-value | p      | 95% Confidence Interval |        |
|                                                                               |   |             |          |            |         |        | Lower                   | Upper  |
| BOS Remote Sentiment                                                          | → | BOS Burnout | -0,166   | 0,071      | -2,358  | 0,018  | -0,305                  | -0,028 |
| BOS Self-eff                                                                  | → | BOS Burnout | -0,446   | 0,119      | -3,757  | < .001 | -0.679                  | -0,213 |
| Note: Robust standard errors, robust confidence intervals, and DWLS estimator |   |             |          |            |         |        |                         |        |

### Fall 2021 EOS Burnout Mediation Analysis

| Direct Effects                                                                |   |             |          |            |         |       |                         |        |
|-------------------------------------------------------------------------------|---|-------------|----------|------------|---------|-------|-------------------------|--------|
|                                                                               |   |             | Estimate | Std. Error | z-value | p     | 95% Confidence Interval |        |
|                                                                               |   |             |          |            |         |       | Lower                   | Upper  |
| EOS Uni Self Manage                                                           | → | EOS Burnout | -0,174   | 0,077      | -2,272  | 0,023 | -0,325                  | -0,024 |
| Note: Robust standard errors, robust confidence intervals, and DWLS estimator |   |             |          |            |         |       |                         |        |

| Indirect Effects                                                              |   |            |   |             |          |            |         |       |                         |        |
|-------------------------------------------------------------------------------|---|------------|---|-------------|----------|------------|---------|-------|-------------------------|--------|
|                                                                               |   |            |   |             | Estimate | Std. Error | z-value | p     | 95% Confidence Interval |        |
|                                                                               |   |            |   |             |          |            |         |       | Lower                   | Upper  |
| EOS Uni Self Manage                                                           | → | EOS Remote | → | EOS Burnout | -0,151   | 0,057      | -2,65   | 0,008 | -0,263                  | -0,039 |
| Note: Robust standard errors, robust confidence intervals, and DWLS estimator |   |            |   |             |          |            |         |       |                         |        |

| Total Effects |  |  |  |  |  |  |                         |  |
|---------------|--|--|--|--|--|--|-------------------------|--|
|               |  |  |  |  |  |  | 95% Confidence Interval |  |
|               |  |  |  |  |  |  |                         |  |

|                                                                               |   |                | Estimate | Std. Error | z-value | p      | Lower  | Upper  |
|-------------------------------------------------------------------------------|---|----------------|----------|------------|---------|--------|--------|--------|
| EOS<br>Uni Self<br>Manage                                                     | → | EOS<br>Burnout | -0,325   | 0,074      | -4,385  | < .001 | -0,471 | -0,018 |
| Note: Robust standard errors, robust confidence intervals, and DWLS estimator |   |                |          |            |         |        |        |        |
